# Supplementary material for: Clinical Profile and Outcomes of Thrombotic Microangiopathy - A Prospective Study From a Tertiary Centre in India
Source: Research Square preprint supplement (doi:10.21203/rs.3.rs-7744574/v1), 2025-10-30
Supplement: Supplementary file 1 [file 2079c2c5f0b9b74f530a4dd7.docx]

## Supplementary Table 1. Hematological trends (Day 1–9)

| Day | Hb (g/dL), TTP | Hb, HUS | Hb, Secondary TMS | p-value | Platelets (×10³/µL), TTP | Platelets, HUS | Platelets, Secondary TMA | p-value |
| --- | --- | --- | --- | --- | --- | --- | --- | --- |
| Day 1 | 10.9 ± 2.6 | 9.2 ± 2.0 | 8.1 ± 2.6 | 0.017 | 57.9 ± 48.2 | 58.5 ± 39.6 | 66.2 ± 48.1 | 0.79 |
| Day 3 | 9.7 ± 2.1 | 8.1 ± 1.8 | 7.3 ± 2.5 | 0.011 | 55.2 ± 47.0 | 62.4 ± 72.7 | 59.0 ± 38.3 | 0.74 |
| Day 5 | 9.5 ± 2.3 | 7.5 ± 1.7 | 7.6 ± 1.8 | 0.014 | 52.1 ± 43.3 | 66.5 ± 34.9 | 71.2 ± 35.7 | 0.19 |
| Day 7 | 8.2 ± 3.7 | 7.8 ± 1.9 | 8.1 ± 1.3 | 0.21 | 73.7 ± 51.1 | 96.1 ± 51.9 | 84.5 ± 57.8 | 0.26 |
| Day 9 | 9.4 ± 2.0 | 8.3 ± 2.0 | 8.1 ± 1.7 | 0.08 | 109.1 ± 94.2 | 144.5 ± 76.2 | 109.7 ± 83.5 | 0.12 |

## Supplementary Table 2. Renal parameters (Day 1–9)

| Day | Creatinine (mg/dL), TTP | Creatinine, HUS | Creatinine, Secondary TMA | p-value | Urea (mg/dL), TTP | Urea, HUS | Urea, Secondary TMA | p-value |
| --- | --- | --- | --- | --- | --- | --- | --- | --- |
| Day 1 | 3.2 ± 1.9 | 7.3 ± 4.5 | 5.4 ± 4.6 | 0.004 | 94.5 ± 47.9 | 141.8 ± 66.8 | 138.9 ± 59.8 | 0.022 |
| Day 3 | 3.7 ± 2.3 | 7.1 ± 4.2 | 6.1 ± 4.3 | 0.010 | - | - | - | - |
| Day 5 | 3.6 ± 2.7 | 6.1 ± 3.3 | 5.8 ± 3.9 | 0.031 | - | - | - | - |
| Day 7 | 3.5 ± 3.0 | 5.1 ± 2.8 | 5.6 ± 3.8 | 0.083 | - | - | - | - |
| Day 9 | 3.2 ± 3.1 | 4.2 ± 3.1 | 5.5 ± 4.2 | 0.132 | - | - | - | - |

## Supplementary Table 3. Hemolysis and coagulation markers (Day 1–9)

| Day | LDH (IU/L), TTP | LDH, HUS | LDH, Secondary TMA | p-value | INR, TTP | INR, HUS | INR, Secondary TMA | p-value | Fibrinogen (mg/dL), TTP | Fibrinogen, HUS | Fibrinogen, Secondary TMA | p-value |
| --- | --- | --- | --- | --- | --- | --- | --- | --- | --- | --- | --- | --- |
| Day 1 | 917 ± 493 | 1521 ± 1065 | 1269 ± 1113 | 0.087 | 1.2 ± 0.5 | 1.3 ± 0.8 | 1.2 ± 0.6 | 0.95 | 196.5 ± 205 | 176.3 ± 129 | 228.4 ± 202 | 0.69 |
| Day 3 | 976 ± 549 | 1649 ± 1039 | 1347 ± 909 | 0.062 | 0.9 ± 0.5 | 1.5 ± 1.6 | 1.2 ± 0.5 | 0.44 | 124.7 ± 211 | 137.5 ± 179 | 156.6 ± 236 | 0.86 |
| Day 5 | 787 ± 481 | 1449 ± 935 | 1858 ± 2312 | 0.051 | 0.9 ± 0.4 | 1.0 ± 0.4 | 0.8 ± 0.5 | NA | 65.2 ± 113 | 109.1 ± 138 | 118.9 ± 227 | 0.48 |

## Supplementary Table 4A. Clinical and outcome profile of snakebite-associated TMA (n = 20)

| Variable | Value |
| --- | --- |
| Mean age (years) | 44.8 |
| Male sex (%) | 80% |
| Baseline hemoglobin (g/dL) | 9.8 |
| Baseline platelet count (×10³/µL) | 66.6 |
| Baseline creatinine (mg/dL) | 7.2 |
| LDH (IU/L) | 1397 |
| Antisnake venom (%) | 100% |
| Hemodialysis required (%) | 75% |
| Plasma exchange performed (%) | 20% |
| Survival (%) | 85% |

## Supplementary Table 4B. Clinical and outcome profile of sepsis-associated TMA (n = 17)

| Variable | Value |
| --- | --- |
| Mean age (years) | 51.6 |
| Male sex (%) | 35.3% |
| Baseline hemoglobin (g/dL) | 10.1 |
| Baseline platelet count (×10³/µL) | 56.6 |
| Baseline creatinine (mg/dL) | 3.8 |
| LDH (IU/L) | 1040 |
| Broad-spectrum antibiotics (%) | 100% |
| Hemodialysis required (%) | 52.9% |
| Plasma exchange performed (%) | 23.5% |
| Survival (%) | 52.9% |
